## **Metabolically-Driven Maturation of hiPSC-Cell Derived Heart-on-a-Chip**

Nathaniel Huebsch<sup>1†</sup>, Berenice Charrez<sup>1†</sup>, Brian Siemons<sup>1</sup>, Steven C. Boggess<sup>2</sup>, Samuel Wall<sup>3</sup>, Verena Charwat<sup>1</sup>, Karoline H. Jæger<sup>3</sup>, Felipe T. Lee-Montiel<sup>1</sup>, Nicholas C. Jeffreys<sup>1</sup>, Nikhil Deveshwar<sup>1</sup>, Andrew Edwards<sup>3</sup>, Jonathan Serrano<sup>4</sup>, Matija Snuderl<sup>4</sup>, Andreas Stahl<sup>5</sup>, Aslak Tveito<sup>3</sup>, Evan W. Miller<sup>2,6,7</sup>, Kevin E. Healy<sup>1,8\*</sup>

1. Department of Bioengineering and California Institute for Quantitative Biosciences (QB3), University of California at Berkeley, Berkeley, California 94720, USA

2. Department of Chemistry, University of California at Berkeley, Berkeley, California 94720, USA

3. Simula Research Laboratory, 1325 Lysaker, Norway

4 Department of Pathology, New York University Langone Health and Medical School, New York, NY, 10016, USA

5 Department of Nutritional Sciences and Toxicology, University of California at Berkeley, Berkeley, California 94720, USA

6 Department of Molecular and Cell Biology, University of California at Berkeley, Berkeley, California, 94720, USA

7 Helen Wills Neuroscience Institute, University of California, Berkeley, Berkeley, California, 94720, USA

8 Department of Materials Science and Engineering, University of California at Berkeley, Berkeley, California, 94720, USA

† These authors contributed equally to this work

+ Current Affiliation: Department of Biomedical Engineering, The Washington University in Saint Louis, Saint Louis, Missouri, 63130, USA

\* Corresponding author: Kevin E. Healy, PhD, 370 Hearst Memorial Mining Building, # 1760, Berkeley, CA 94720

Telephone: (510) 643-3559

Email: [kehealy@berkeley.edu](mailto:kehealy@berkeley.edu)

Running Title: Metabolically Driven Maturation of hiPSC-Derived Heart-On-A-Chip

Keywords: Microphysiological Systems, Induced Pluripotent Stem Cells, Tissue Chips



month), large scale formats, and/or complex setups to execute. These issues would lead to cost and logistical limitations to their translation to higher-throughput analyses that would be essential to use these technologies for applications like drug development.

As bioreactor approaches have limited scalability, and tissue engineered microenvironments alone are not sufficient to induce hiPSC-CM maturation consistent with the adult heart, there has been a focus on combining tissue engineering approaches with soluble cues. Transplanting hiPSC-CM into neonatal rodent hearts enhances maturation (Kadota *et al.* 2017), suggesting that the soluble milieu of the heart is compatible with this process. Reductionist approaches have used specific soluble cues from the fetal and post-natal heart, including cytokines (Rupert *et al.* 2017, Tiburcy *et al.* 2017), micro-RNAs (Kuppusamy *et al.* 2015), heart specific extracellular matrix (Fong *et al.* 2016) and hormones (Yang *et al.* 2014) to enhance the maturity of hESC-CM and hiPSC-CM.

The metabolic milieu is a key component of cells' soluble environment. Postnatally, the heart switches from glycolysis to fatty-acid oxidation as its primary source of Adenosine triphosphate (ATP; Lopaschuck *et al.* 2010, Makinde *et al.* 1998). Previously, 2D hiPSC-CM monolayers and engineered tissues exposed to glucose-depleted, fatty-acid enriched media exhibited more mature metabolic profiles and physiology compared to hiPSC-CM cultured in standard media (Correia *et al.* 2018, Mills *et al.* 2017, Rana *et al.* 2012). However, fatty-acid based media has not been studied in the context of MPS. We hypothesized that the combination of aligned, 3D culture and fatty-acid could enhance electrophysiological maturation of hiPSC-CM within cardiac MPS. Using a Design of Experiments approach, (Jha *et al.* 2014, Stile *et al.* 2002, Phadke *et al.* 1989), we identified fatty-acid based Maturation Media (MM) that induced a shortened, adult-like Action Potential Duration (APD), and enhanced the pharmacologic relevance of hiPSC-based MPS. MM-treated MPS also exhibited changes in expression of ion-channel and calcium handling genes, including Sarcolipin (SLN). In contrast, the same media had no effects on 2D hiPSC-CM monolayers. Combined with mathematical modeling, gene expression changes in MM-cultured MPS explained a significant amount of the observed changes in action potential and pharmacology.

























## **Mathematical Modeling**

Time-series of AP and Ca<sup>2+</sup> flux from MPS paced at 1Hz were inverted to a mathematical model of ion channel activity and calcium dynamics to obtain simulated estimates of channel conductance and calcium handling as described in our recent publication (Tveito *et al.* 2018). Briefly, a modified version of a model of an immature stem cell (Paci *et al.* 2015) was used to calculate the predicted voltage and calcium dynamics. Parameters of this model, specifically maximal channel conductances, intracellular calcium diffusion terms, and surface to area ratios, were then iteratively perturbed until the error between the measured waveforms and simulated waveforms was minimized. Resulting parameters and produced action potential models were then plotted by group to provide an explanation for mechanistic reasons for changes in action potential.

## **Statistical Analysis**

Direct comparisons were made by non-paired student's *t*-test, with Holm-Bonferonni correction for multiple comparisons. All curve fitting was done using GraphPad Prism. IC<sub>50</sub> and EC<sub>50</sub> curves were fit to four-parameter models. When these models yielded ambiguous fits (Fig. 4A, 5C, 5D, 5F and 5G), a three-parameter model was used. Gene expression data were statistically analyzed with ClustVis (web tool for clustering multivariate data) and GraphPad Prism. Overall PCR data were plotted on ClustVis to obtain heatmaps of the gene expression for maturation media treated MPS relative to standard media values. The genes within 70% percentile of differential expression were then selected and plotted on GraphPad Prism where a *t*-test was performed to compare standard media and maturation media values using the Holm-Sidak method. Significance was determined with *p*-value < 0.05.

## **Acknowledgements**

This work was funded in part by the California Institute for Regenerative Medicine DISC2-10090 (K.E.H.), NIH-NHLBI HL130417 (K.E.H.), NIH-NIGMS R35GM1195855 (E.W.M.), NIH-NIGMS T32GM066698 (S.B.), NIH-R01DK101293 (A.S.), the Research Council of Norway INTPART Project 249885, the SUURPh program funded by the Norwegian Ministry of Education and Research, and the Peder Sather Center for Advanced Study (UC Berkeley). We thank Mary West (UC Berkeley) for assistance with image analysis and flow cytometry and Silvio Weber (Technische Universität Dresden) and Stacey Renschler (Washington University in St. Louis) for helpful advice on RNA isolation, cDNA amplification and data analysis. We thank Yoram Rudy, Jon Silva and Jianmin Cui (Washington University in St. Louis) for critical discussion on action potential acquisition, mathematical modeling and data analysis.

Professor Kevin E. Healy has a financial relationship with Organos Inc. and both he and the company may benefit from commercialization of the results of this research.



















$I_{NaCa}$  and (C)  $I_{CaL}$ . **D-E**) Potassium current fluxes (D)  $I_{Kr}$  and (E)  $I_{K1}$ . \*\*  $p < 0.01$ , 2-way  $t$ -test. The sample in A) was chosen as the sample with the median value for integrated  $I_{NaCa}$  current density in B.
